# Supplementary material
Source: HighWire-hosted journal article supplement (https://thorax.bmj.com/content/73/10/908)
Supplement: inline-supplementary-material-1 [file inline-supplementary-material-1.pdf]

## SUPPLEMENTARY INFORMATION

**Supplementary Figure 1: Murine models.** (A) HDM model; female BALB/c (8-10 wks) mice were challenged with 35  $\mu$ l of whole HDM extract (0.7 mg/mL) in saline intranasal (i.n.), for 2 weeks. IDR-1002 was administered subcutaneously (6 mg/kg) 3 times a week. (B) HDM + IL-33 co-challenge model; female BALB/c (8-10 wks) mice were challenged with 35  $\mu$ l of whole HDM extract (0.7 mg/mL) in saline intranasal (i.n.), for 2 weeks. 1  $\mu$ g of IL-33 was administered i.n. on days 8-12. IDR-1002 was administered subcutaneously 3 times a week at 6 mg/kg. (C) IL-33 model; female BALB/c (8-10 wks) mice received IDR-1002 administered subcutaneously (6 mg/kg) 3 times a week for 2 weeks, recombinant IL-33 (1  $\mu$ g per mouse) was administered (i.n.) on days 8-12.

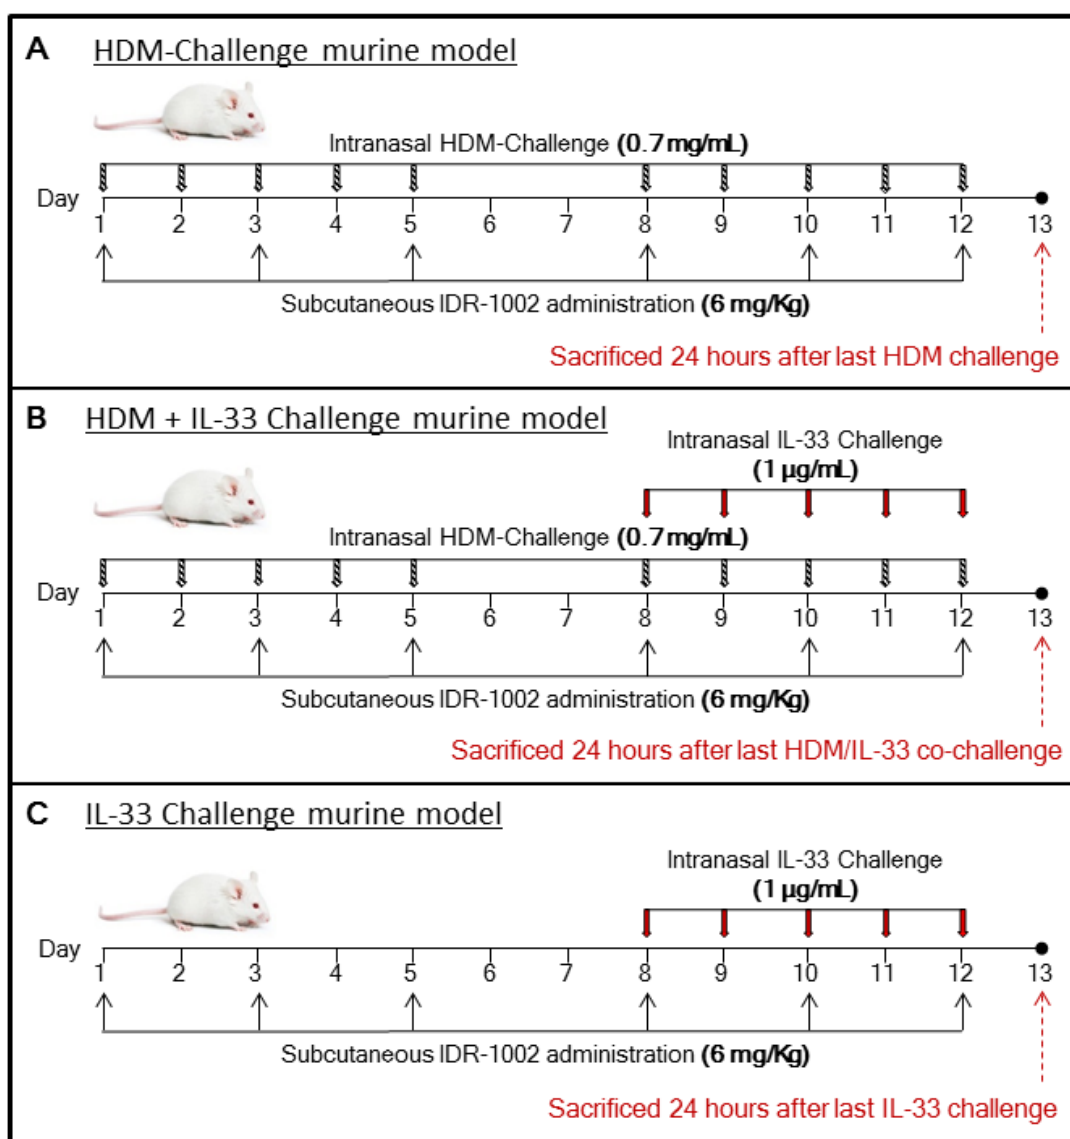

**Supplementary Figure 2: Subcutaneous administration of IDR-1002 markedly decreases goblet cell hyperplasia.** Female BALB/c (8-10 wks) mice (n=2-4 mice per group) were challenged with 35  $\mu$ l of whole HDM extract (0.7 mg/mL) in saline intranasal (i.n.), for 2 weeks. IDR-1002 was administered subcutaneously at a dose of 6 mg/Kg per mouse three times per week. Lung sections (6  $\mu$ m) were stained with PAS staining. **(A)** Representative images of PAS staining of the lung tissue. **(B)** Number of goblet cells per mm of basement membrane length. Each dot represents individual airways. Statistical significance was determined by one-way ANOVA with Tukey's multiple comparisons test

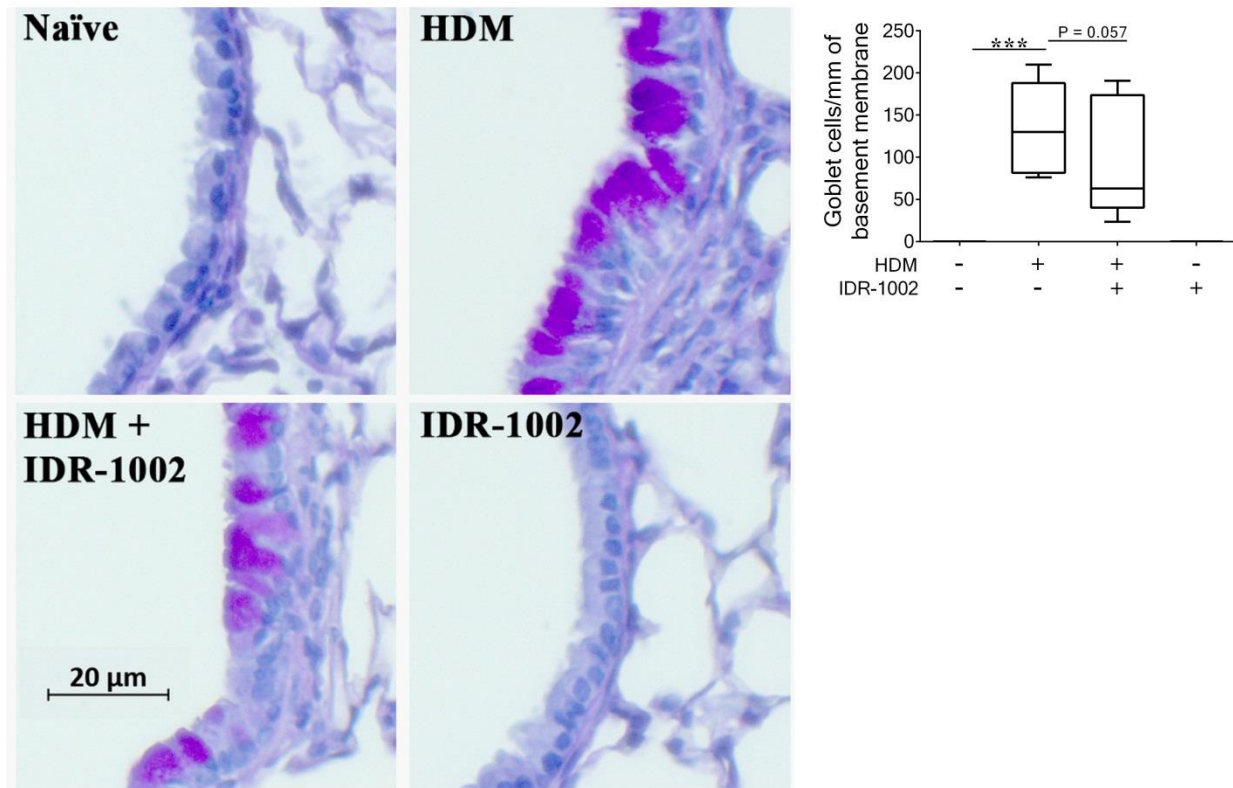

**Supplementary Figure 3. Cytokine expression profile in lung homogenates of HDM-challenged mice, in the presence and absence of IDR-1002.** Female BALB/c (8-10 wks) mice (n=9-10 mice per group) were challenged with 35  $\mu$ L of whole HDM extract (0.7 mg/mL) in saline intranasal (i.n.), for 2 weeks. IDR-1002 was administered subcutaneously at a dose of 6 mg/Kg per mouse three times per week. Lung tissue homogenates were monitored for a panel of cytokines, 24 hr after the last HDM challenge. Production of IFN- $\gamma$ , IL-1 $\beta$ , IL-10, IL-12 p70, IL-2, IL-4, IL-5, IL-6, KC, TNF- $\alpha$ , IL-33, TSLP, IL-25, MDC and TARC were monitored by the multiplex Meso Scale Discovery (MSD) platform or ELISA. Bar's shows median and interquartile range, whiskers show min and max points. One-way ANOVA with Tukey's multiple comparisons test was used to assess statistical significance (\* $p \leq 0.05$ , \*\* $p \leq 0.01$ , \*\*\* $p \leq 0.001$ ).

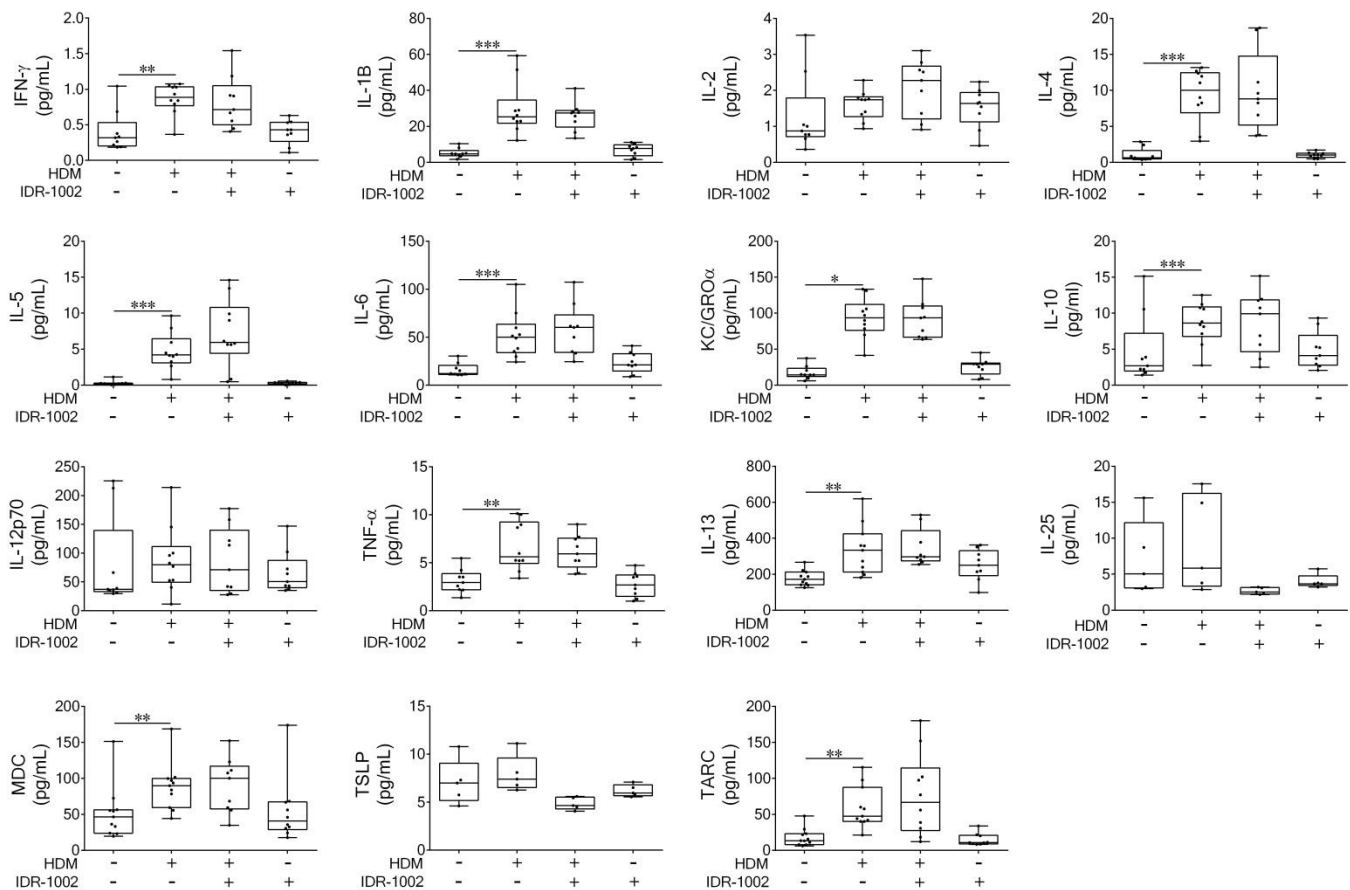

**Supplementary Figure 4: Peptide IDR-1 does not alter IL-33 production in human primary bronchial epithelial cells (PBEs).** Human Primary Bronchial Epithelial cells obtained from 4 donors were stimulated with TNF $\alpha$  (20 ng/mL) and IFN $\gamma$  (30 ng/mL), in the presence and absence of IDR-1 (20 and 40  $\mu$ M). IL-33, IRF1 and IP10 abundance was monitored in cytoplasmic fractions of the cell lysates by western blots, 24 hr post-stimulation. Protein abundance was quantified by densitometry. (A) A representative immunoblot for all proteins, and densitometry analysis (n=4) for (B) IL-33, (C) IRF1 and (D) IP-10 are shown. Protein fold change shown in the graphs represents relative band intensity compared to that in unstimulated cells normalized to 1, after normalization with  $\beta$ -actin for protein input. Each dot represents an individual donor, and bars show the median and interquartile range. RM one-way ANOVA with Fisher's LSD test was used for statistical analyses (\* $p \leq 0.05$ , \*\* $p \leq 0.01$ ).

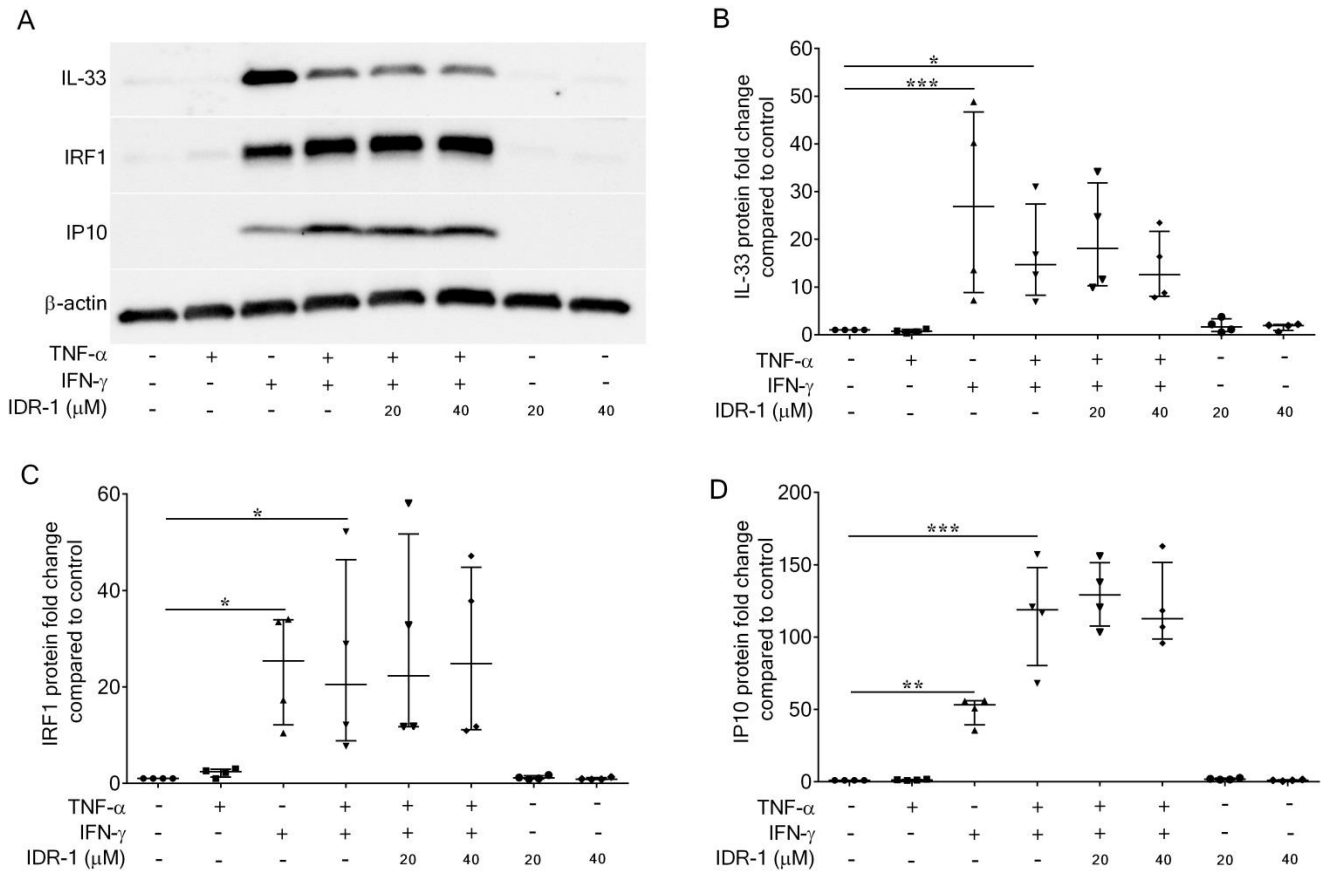

**Supplementary Table 1: Demographics of donors of human PBECs used in this study.**

| Donor # | Gender | Age | Height | Weight | BMI   | Current smoker | Ex-Smoker | Pack years | Oral Steroids | Inhaled Steroids |
|---------|--------|-----|--------|--------|-------|----------------|-----------|------------|---------------|------------------|
| BR384   | Female | 55  | 168    | 90     | 31.9  | No             | Yes       | unknown    | Yes           | No               |
| BR390   | Female | 68  | 162    | 61     | 23.24 | No             | Yes       | 55         | No            | No               |
| BR421   | Male   | 56  | 181    | 83     | 25.3  | No             | Yes       | unknown    | unknown       | unknown          |
| BR448   | Male   | 74  | 160    | 68     | 27    | No             | No        | 0          | No            | No               |
